# Supplementary material for: Full title: High glucose protects mesenchymal stem cells from metformin-induced apoptosis through the AMPK-mediated mTOR pathway
Source: PubMed Central journal article supplement (PMC6882892; doi:10.1038/s41598-019-54291-y), 2019-11-28

**Full title:** High glucose protects mesenchymal stem cells from metformin-induced apoptosis through the AMPK-mediated mTOR pathway

**Authors:** Xiao He, Yi Yang, Meng-Wei Yao, Ting-ting Ren, Wei Guo, Ling Li, Xiang Xu

Supplementary information. The unprocessed images for Figure 2.

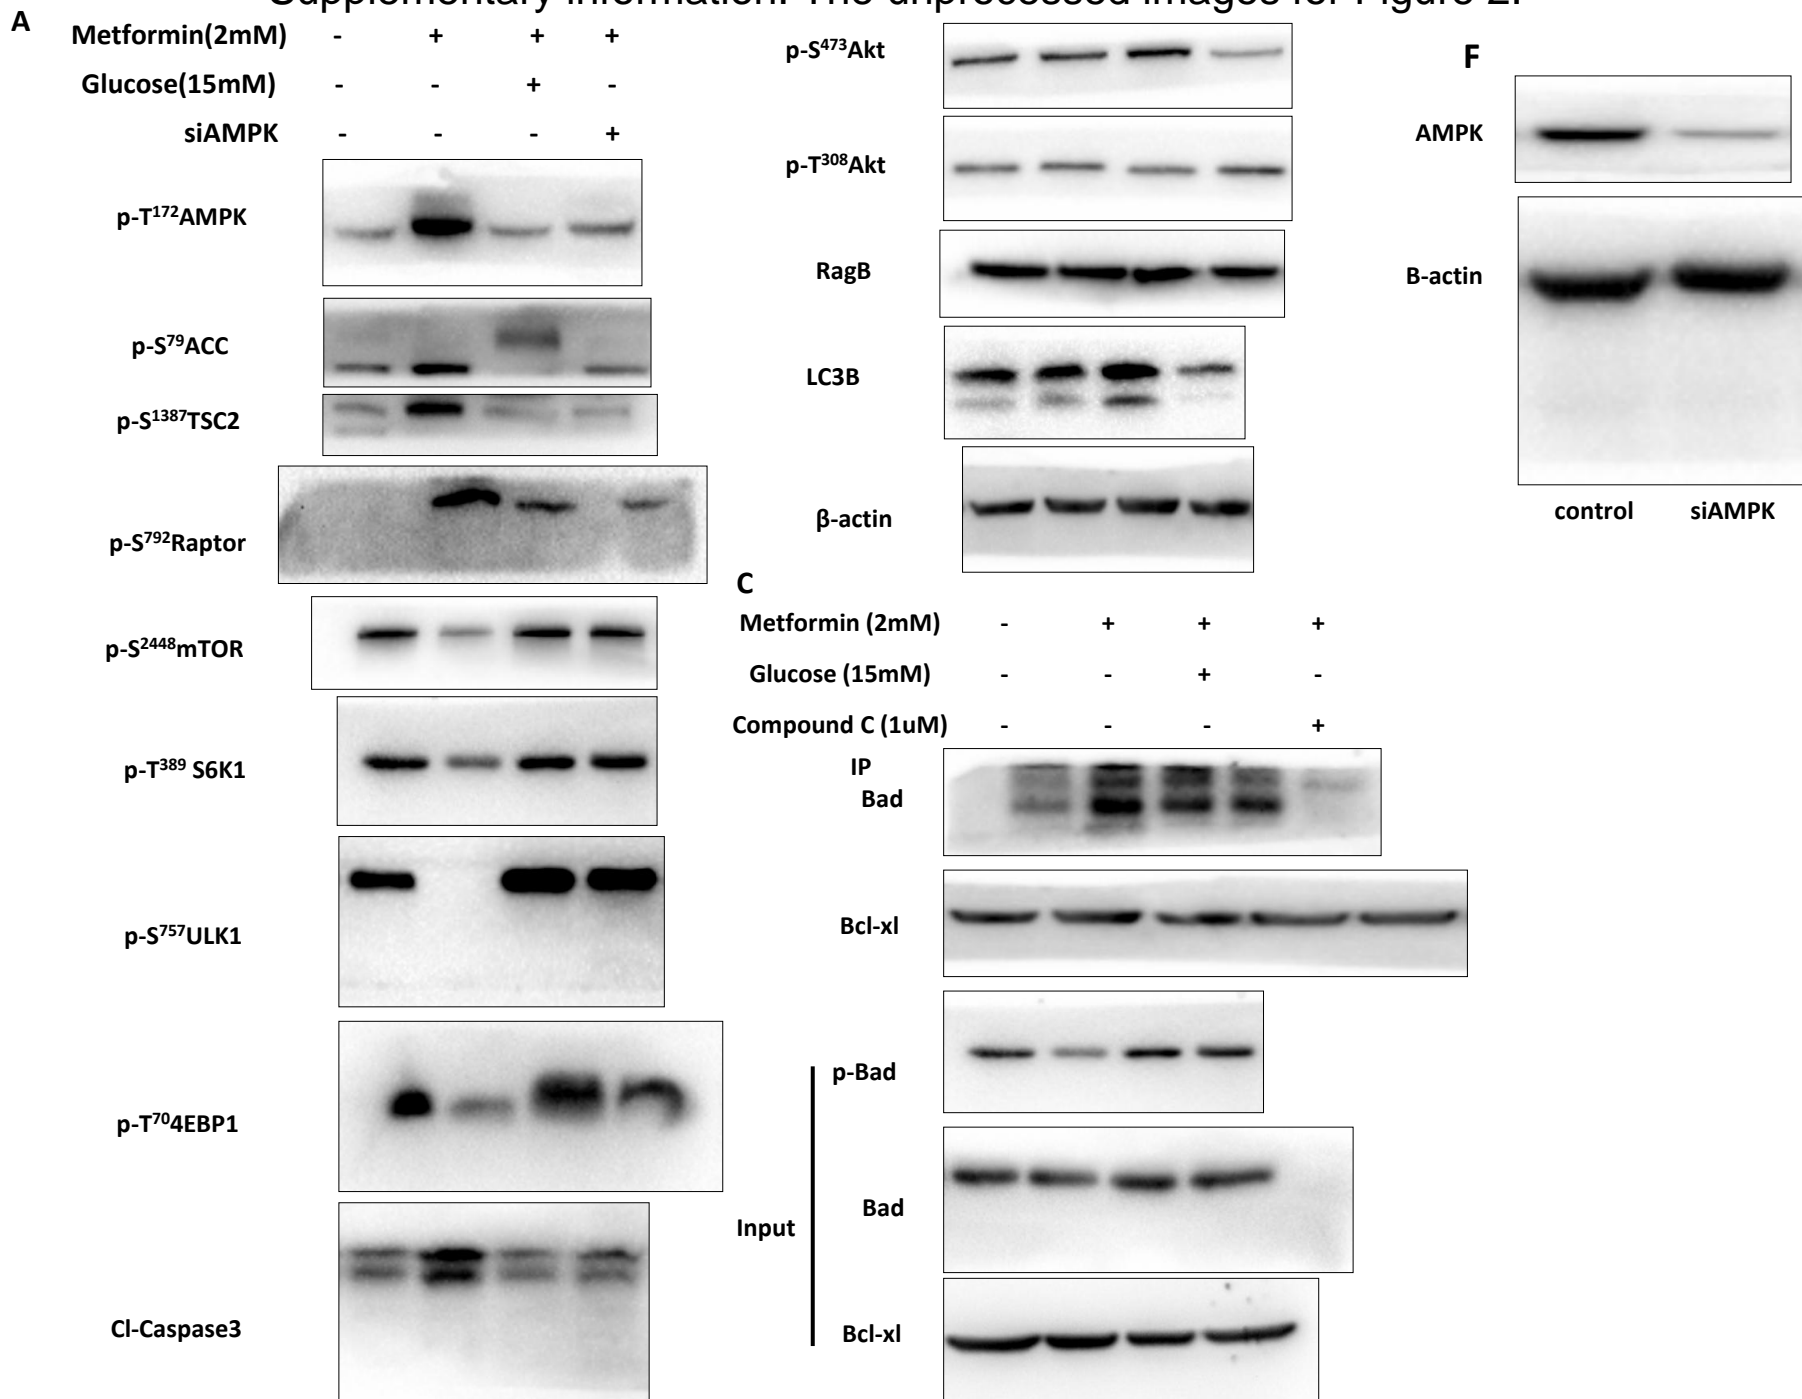

Supplement: 41598_2019_54291_MOESM1_ESM.pdf [file 41598_2019_54291_MOESM1_ESM.pdf]
